# Supplementary material for: Comparative Analysis of Mycobacterium tuberculosis pe and ppe Genes Reveals High Sequence Variation and an Apparent Absence of Selective Constraints
Source: PLoS One. 2012 Apr 4;7(4):e30593. doi: 10.1371/journal.pone.0030593 (PMC3319526; doi:10.1371/journal.pone.0030593)
Supplement: Table S2 — 2 homologous genes (PPE38 & PPE71) in most isolates. Hotspot for IS6110 integration and homologous recombination [26] . (XLS) [file pone.0030593.s002.xls]

## Sheet: Sheet1
Gene	Gene size (H37Rv)	#isolates	nsSNPs	sSNPs	In frame indels	Frameshifts	IS6110 insertions	Homologos recombination	Partial/whole gene deletions	Total diff var types	Total isolates with predicted protein change	proportion of isolates with predicted protein change	Comments	Gene	Micomutations %	Macromutations %
PPE68	1107	18	2	0						2	2	0.11		PPE68	0.11	0
PPE4	1542	14	1	2		1				4	2	0.14		PPE4	0.14	0
PPE11	1557	18	2	1						3	2	0.11		PPE11	0.11	0
PPE37	1422	15	3	0	1	2				6	5	0.33		PPE37	0.33	0
PPE67	234	15	2	1					1	4	3	0.2		PPE67	0.133	0.067
PPE2	1671	11	5	1						6	3	0.27		PPE2	0.27	0
PPE3	1611	10	4	2						6	4	0.4		PPE3	0.4	0
PPE46	1305	7	2	0	1			1		4	2	0.29		PPE46	0.14	0.143
PPE48/47	1077	8	1	0		1		2		4	3	0.38	PPE48 predicted to split into 2 genes (PPE47) in H37Rv due to frameshift introducing a stop codon followed by new start codon. Frequent recombination between PPE48/47 and PPE46.	PPE48/47	0.125	0.25
PPE66	946	16	2	0		1			1	4	4	0.25		PPE66	0.188	0.065
PPE1	1392	18	5	3						8	5	0.28		PPE1	0.28	0
PPE20	1620	14	5	1						6	5	0.36		PPE20	0.36	0
PPE36	732	18	1	0		1			1	3	3	0.17		PPE36	0.118	0.059
PPE69	1200	15	3	3					1	7	2	0.13		PPE69	0.065	0.065
PPE41	585	16	0	1					1	2	1	0.06		PPE41	0	0.06
PPE57		16						see comment	1	6	6	0.38	Multiple instances of homologous recombination events between the highly homologous PPE57, PPE58 and PPE59 genes. Numerous instances of whole gene deletion along with PPE58.	PPE57	0	0.38
PPE58		16						see comment	1	3	3	0.19	Multiple instances of homologous recombination events between the highly homologous PPE57, PPE58 and PPE59 genes. Numerous instances of whole gene deletion along with PPE57.	PPE58	0	0.19
PPE59		17						see comment	1	4	3	0.18	Multiple instances of homologous recombination events between the highly homologous PPE57, PPE58 and PPE59 genes.	PPE59	0	0.18
PPE9	543	10	1	0	1	1				3	3	0.3		PPE9	0.3	0
PPE17	1041	18	1	1		1				3	2	0.11		PPE17	0.11	0
PPE29	1272	13	4	1		1				6	3	0.23		PPE29	0.23	0
PPE30	1392	15	2	0			1			3	3	0.2		PPE30	0.133	0.067
PPE31	1200	17	5	1						6	4	0.24		PPE31	0.24	0
PPE32	1230	18	1	1						2	1	0.06		PPE32	0.06	0
PPE33	1407	17	4	1						5	4	0.24	PPE33 predicted to split into 2 genes (PPE33b) in M. bovis due to nsSNP introducing astop codon followed by new start codon.	PPE33	0.24	0
PPE65	1242	17	2	3					1	6	3	0.18		PPE65	0.118	0.059
PPE14	1272	18	2	1						3	2	0.11		PPE14	0.11	0
PPE50		18	ND	ND								ND	Gene deleted in numerous isolates. Multiple macromutational events results in highly divergent gene sequences.	PPE51	0	0
PPE51	1143	17	0	0						0	0	0		PPE61	0.28	0
PPE61	1221	18	3	1	1	1				6	5	0.28		PPE44	0.11	0
PPE44	1149	18	2	1						3	2	0.11		PPE15	0.25	0
PPE15	1176	16	2	0		2				4	4	0.25		PPE43	0.18	0
PPE43	1185	17	2	0		1				3	3	0.18		PPE18	0	0.44
PPE18		16						see comment		7	7	0.44	Multiple instances of homologous recombination events between the highly homologous PPE19, PPE18 and PPE60 genes.	PPE19	0	0.56
PPE19		18						see comment		10	10	0.56	Multiple instances of homologous recombination events between the highly homologous PPE19, PPE18 and PPE60 genes.	PPE60	0	0.4
PPE60		15						see comment		6	6	0.4	Multiple instances of homologous recombination events between the highly homologous PPE19, PPE18 and PPE60 genes.	PPE22	0.29	0
PPE22	1158	14	4	0						4	4	0.29		PPE26	0.24	0
PPE26	1182	17	3	0	1					4	4	0.24		PPE23	0.06	0
PPE23	1185	18	1	0						1	1	0.06		PPE45	0.13	0
PPE45	1227	16	2	0						2	2	0.13		PPE25	0.2	0.267
PPE25	1098	15	3	1	1			4		9	7	0.47	Multiple instances of homologous recombination with PPE27 observed.	PPE27	0.13	0
PPE27	1053	16	2	2						4	2	0.13		PPE49	0.06	0
PPE38/71		18	ND	ND								ND	2 homologous genes (PPE38 & PPE71) in most isolates. Hotspot for IS6110 integration and homologous recombination [26].	PPE10	0.29	0
PPE49	1176	18	1	0						1	1	0.06		PPE12	0.12	0
PPE10	1464	14	4	0		1				5	4	0.29		PPE21	0.24	0
PPE12	1938	17	1	1	1					3	2	0.12		PPE39	0.143	0.357
PPE21	2283	17	4	0		1				5	5	0.24		PPE40	0.188	0.313
PPE39	1869	14	1	0	1	1	2	1	2	8	7	0.5	IS6110 integration hotspot. 3 IS6110 integrations identified but 2 (Haarlem & F11) are identical [27]. Identical PPE39/40 recombination mutation in 2 unrelated isolates due to identical 5' gene sequences.	PPE5/6	0.87	0
PPE40	1848	16	2	1	1		2. See comments	2. See comments	1	9	8	0.5	IS6110 integration hotspot. Integration at same point in 2 isolates [27]. Identical PPE39/40 recombination mutation in 2 unrelated isolates due to identical 5' gene sequences.	PPE54	1	0
PPE5/6	9507	15	13	9	5	4				31	13	0.87	PPE6 predicted split into 2 genes (PPE5) in some isolates due to frameshifts introducing stop codon followed by new start codon.	PPE7/8	1	0
PPE54		10								see comments	10	1	Extreme levels of variation observed. "Normal" gene sequence difficult to determine.	PPE16	0.25	0.063
PPE7/8	10329	12	17	8	5	3				33	12	1	PPE8 predicted to split into 2 genes (PPE7) in some isolates and 3 genes in CPHL_A due to frameshifts introducing stop codon followed by new start codon. Extreme levels of variation observed.	PPE24	1	0
PPE16	1857	16	2	1		1	1		1	6	5	0.31		PPE13	0.41	0
PPE24		13								see comments	13	1	Extreme levels of variation observed. "Normal" gene sequence difficult to determine.	PPE34	1	0
PPE13	1332	17	2	2		5. See comments				8	7	0.41	15 -18 bp polyC/polyA region at 3' end of gene responsible for multiple frameshift mutations.	PPE35	0.33	0
PPE34		17								see comments	17	1	Extreme levels of variation observed. "Normal" gene sequence difficult to determine.	PPE28	0.24	0
PPE35	2964	18	6	1	1	1				9	6	0.33	PPE35 predicted split into 2 genes (PPE35b) in M. bovis due to frameshift introducing stop codon followed by new start codon.	PPE63	0.13	0
PPE28	1968	17	4	1						5	4	0.24		PPE42	0.14	0
PPE63	1440	15	2	0						2	2	0.13		PPE53	0.42	0
PPE42	1743	14	2	0						2	2	0.14		PPE62	0.27	0
PPE53	1773	12	4	0	2	1				7	5	0.42		PPE52	0.18	0
PPE62	1749	15	2	0	2					4	4	0.27		PPE64	0.44	0
PPE52	1230	11	1	0		1				2	2	0.18		PPE55	1	0
PPE64	1659	16	3	0	3	1				7	7	0.44		PPE56	0.67	0
PPE55		9								see comments	9	1	PPE55 predicted split into 2 or 3 genes in some isolates due to frameshifts introducing stop codon followed by new start codon. Extreme levels of variation observed. "Normal" gene sequence difficult to determine.
PPE56	11151	6	8	4		2				14	4	0.67	PPE56 predicted to split into 2 genes (PPE56b) in M. bovis due to nsSNP introducing astop codon followed by new start codon.
	100657	Av = 15.17	163	57	27	35	6		13
			concat Ka = 0.0023	concat Ks = 0.0022
