# Supplementary material for: Comparative Analysis of Mycobacterium tuberculosis pe and ppe Genes Reveals High Sequence Variation and an Apparent Absence of Selective Constraints
Source: PLoS One. 2012 Apr 4;7(4):e30593. doi: 10.1371/journal.pone.0030593 (PMC3319526; doi:10.1371/journal.pone.0030593)
Supplement: Table S3 — (XLS) [file pone.0030593.s003.xls]

## Sheet: Sheet1
Gene	Size (H37Rv)	#isolates	nSNPs	sSNPs	In frame Indels	Frameshifts	IS6110 insertions	Partial/whole gene deletions	total diff var types	total diff vars (protein changes)	proportion functional variation			Gene	micromutation	macromutation
PE35	297	17	1	0		1			2	2	0.18			PE35	0.18	0
PE34	336	18	1	0					1	1	0.06			PE34	0.06	0
PE5	309	18	0	0					0	0	0			PE5	0	0
PE15	309	17	1	0					1	1	0.06			PE15	0.06	0
PE29	315	9	0	0					0	0	0			PE29	0	0
PE36	234	18	0	0					0	0	0			PE36	0	0
PE25	300	18	0	0					0	0	0			PE25	0	0
PE22	297	18	0	0				1	1	1	0.06			PE22	0	0.06
PE11	303	18	0	1					1	0	0			PE11	0	0
PE20	300	16	0	0					0	0	0			PE20	0	0
PE18	300	18	1	1			1		3	2	0.11			PE18	0.06	0.06
PE19	300	18	0	1					1	0	0			PE19	0	0
PE32	300	18	0	1				1	2	1	0.06			PE32	0	0.06
PE13	300	17	0	0					0	0	0			PE13	0	0
PE31	297	17	1	1					2	1	0.06			PE31	0.06	0
PE7	300	17	0	0					0	0	0			PE7	0	0
PE8	828	16	1	2					3	1	0.06			PE8	0.06	0
PE27	828	15	4	0					4	4	0.27			PE27	0.27	0
PE2	1578	18	1	1		4 (same isolate)			6	2	0.11			PE2	0.11	0
PE24	1005	18	1	0					1	1	0.06			PE24	0.06	0
PE26	1479	8	2	0					1	1	0.13			PE26	0.13	0
PE4	1509	18	5	1		1			7	6	0.33			PE4	0.33	0
PE3	1407	17	4	1					5	4	0.24			PE3	0.24	0
PE12	927	18	2	0		1			3	3	0.17			PE12	0.17	0
PE14	333	15	0	0		1			1	1	0.07			PE14	0.07	0
PE16	1587	15	0	1					1	0	0			PE16	0	0
PE23	1149	17	3	0					3	3	0.18			PE23	0.18	0
PE17	933	16	0	0	1				1	1	0.06			PE17	0.08	0
PE1	1767	18	5	1		1			7	5	0.28			PE1	0.28	0
PE9	435	18	0	0					0	0	0			PE9	0	0
PE10	363	15	1	0		1			2	2	0.13			PE10	0.13	0
PE33	285	17	0	0					0	0	0			PE33	0	0
PE6	516	14	1	0		1			2	2	0.14			PE6	0.14	0
	21726	16.51 Av	35	12					61		2.82
		Ka Concat = 0.0022	Ks Concat = 0.0022
		545
